# Supplementary material
Source: PubMed Central journal article supplement (PMC6156608)
Supplement: pnas.1804264115.sapp.pdf [file pnas.1804264115.sapp.pdf]

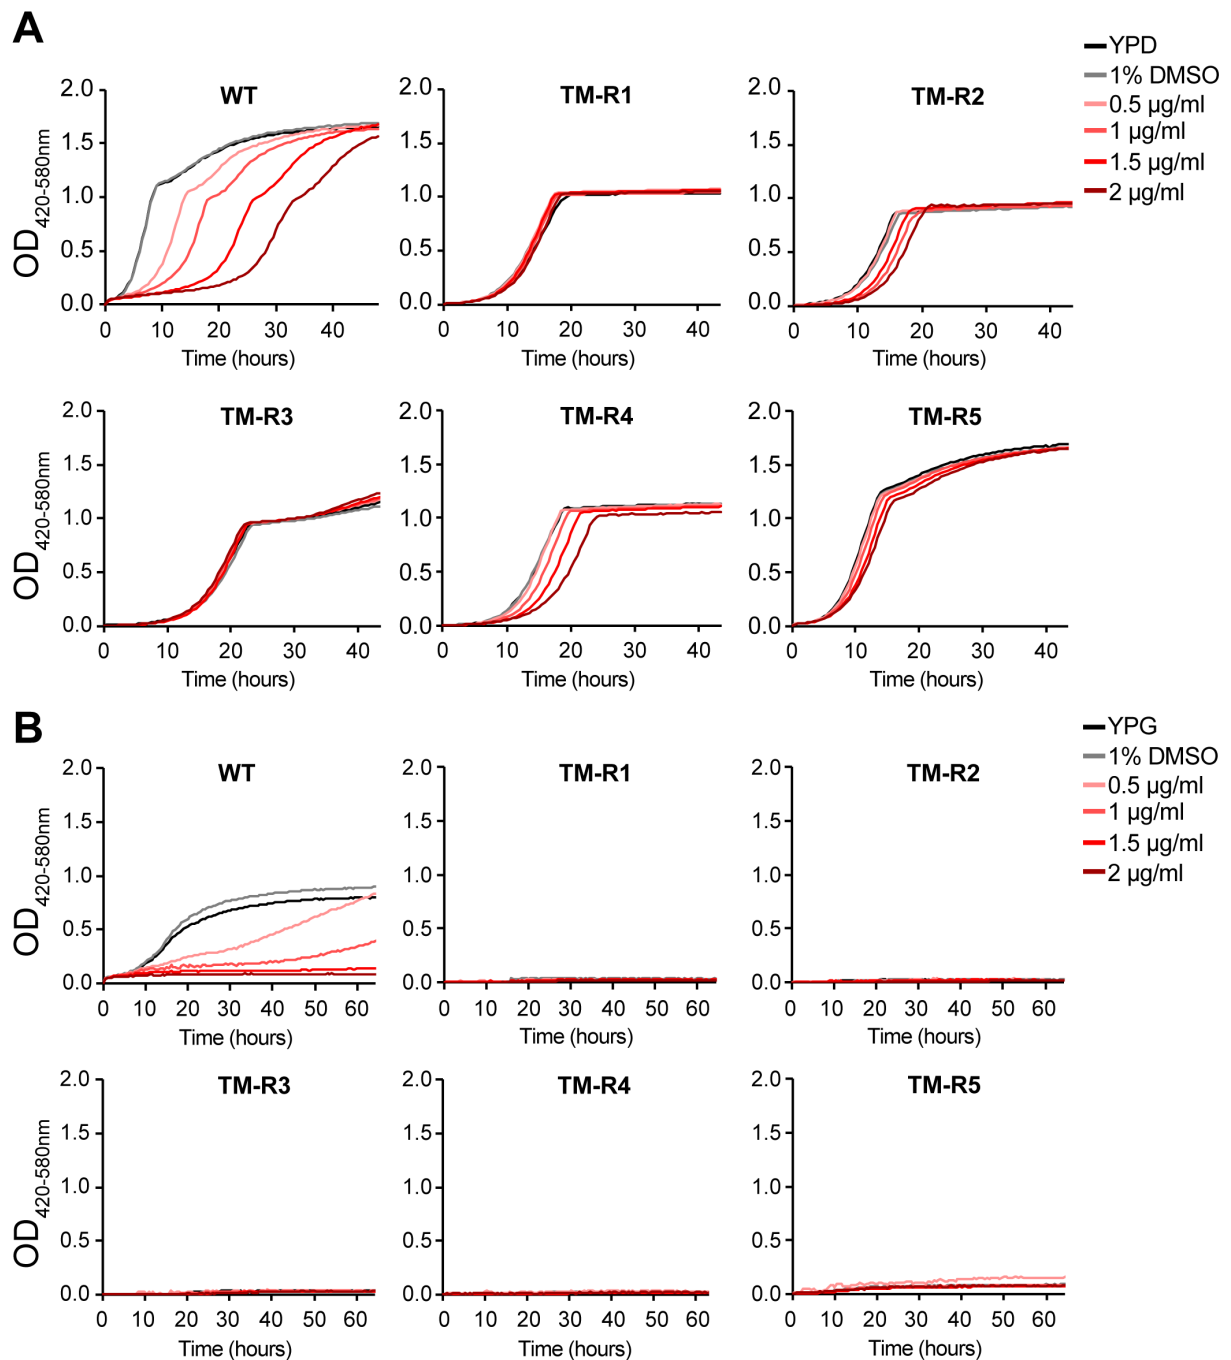

**Fig. S1.** Representative growth curves of the tunicamycin-resistant mutants. (A) Tunicamycin dose response of the tunicamycin-resistant (TM-R) mutants grown in YPD media. (B) TM-R mutants are unable to grow in media containing 3% glycerol (YPG) as a carbon source. Growth rates were analyzed in the presence of indicated concentration of tunicamycin or 1% DMSO as a control.

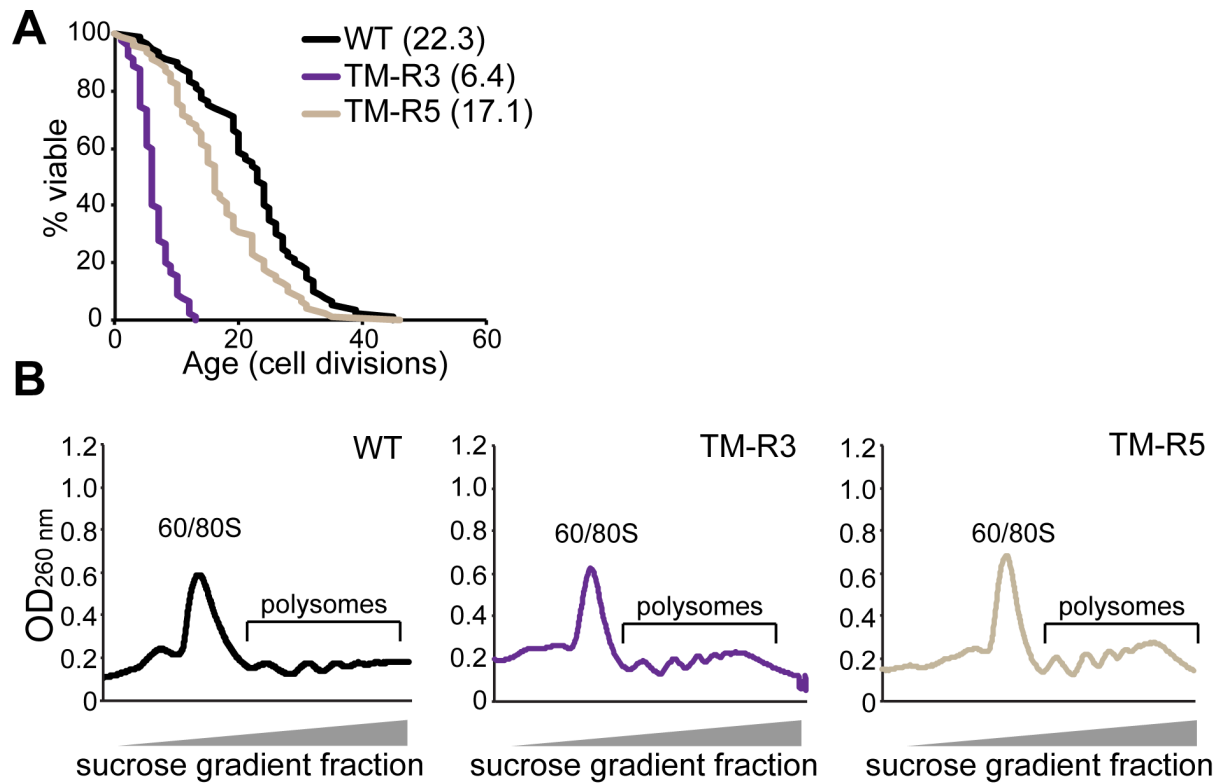

**Fig. S2.** Aneuploidy shortens replicative lifespan without reducing overall mRNA translation. (A) Survival curves for tunicamycin-resistant (TM-R) mutants and corresponding experiment-matched wild-type cells. Mean lifespans are shown in parentheses. (B) Polysome profiles of wild-type cells and tunicamycin-resistant (TM-R) mutants. Aliquots of cell extracts containing 50 OD<sub>260</sub> units were loaded on top of sucrose gradients (10-50% wt/wt) and sedimented at 35,000 rpm at 4°C in a SW41 Ti rotor (Beckman) for 3 hrs. Fractions were collected using the Brandel gradient fractionation system and profiles were monitored at 254 nm.

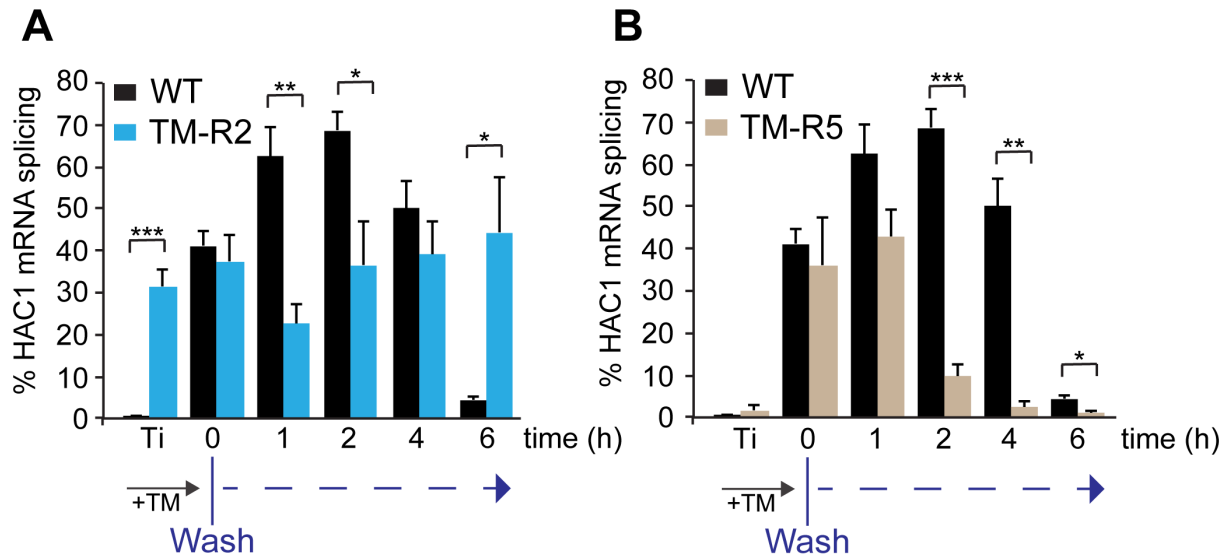

**Fig. S3.** Quantification of spliced *HAC1* mRNA after TM washout in the TM-R2 (A) and TM-R5 (B) mutants. Logarithmically growing cells were treated with 1  $\mu\text{g/ml}$  TM for 30 min, cells were washed and incubated in fresh media for indicated time. Levels of spliced (spl) and unspliced (us) *HAC1* mRNA were detected by RT-PCR. Error bars represent SEM (n=3). \* $p < 0.05$ , \*\* $p < 0.01$ , \*\*\* $p < 0.001$ , Student's *t* test.

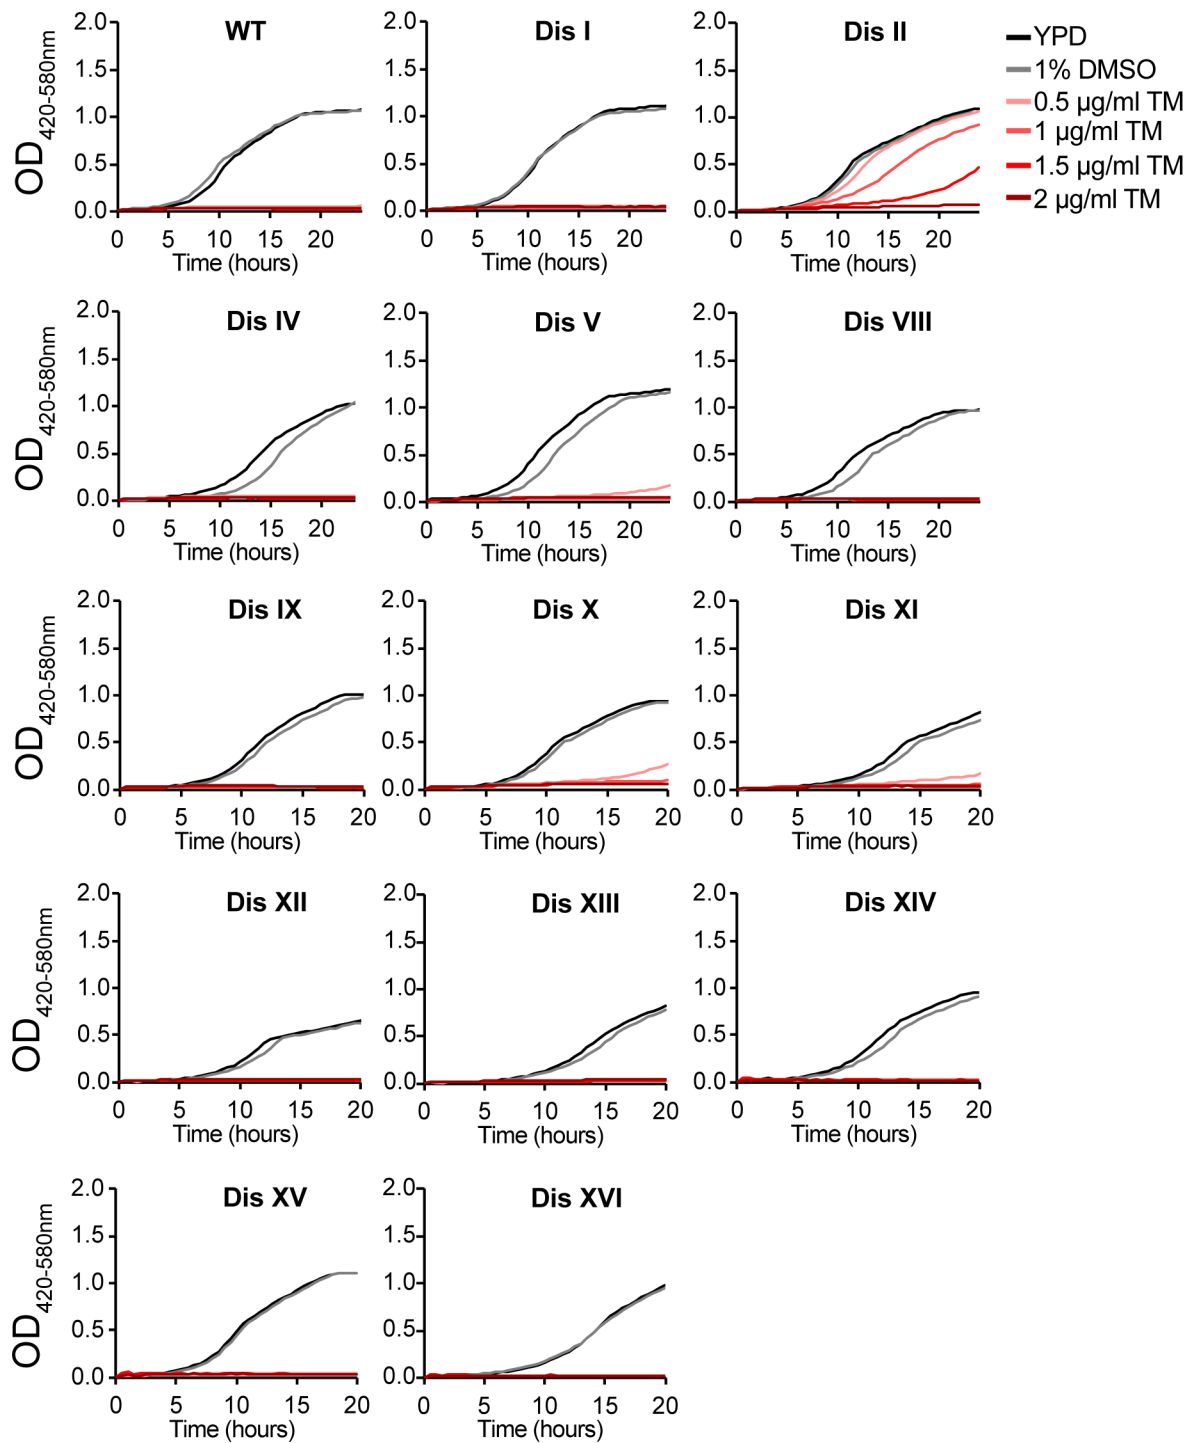

**Fig. S4.** Chr II duplication is sufficient to confer ER stress resistance to cells. Growth rates of wild-type (W303) cells and disomic (Dis) strains were analyzed in the presence of indicated concentration of tunicamycin or 1% DMSO as a control.

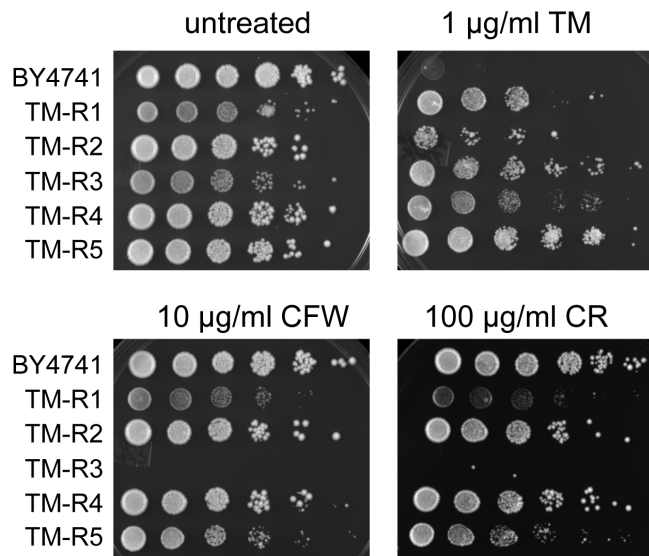

**Fig. S5.** Sensitivity of the TM-R mutants to cell-wall stress. Wild-type (BY4741) cells and TM-R strains were grown in YPD to mid-log phase.  $10\times$  serial dilutions of logarithmically growing cells were spotted on YPD plates containing the indicated concentrations of tunicamycin (TM), calcofluor white (CFW) or congo red (CR) and incubated for 48 h at  $30^{\circ}\text{C}$ .

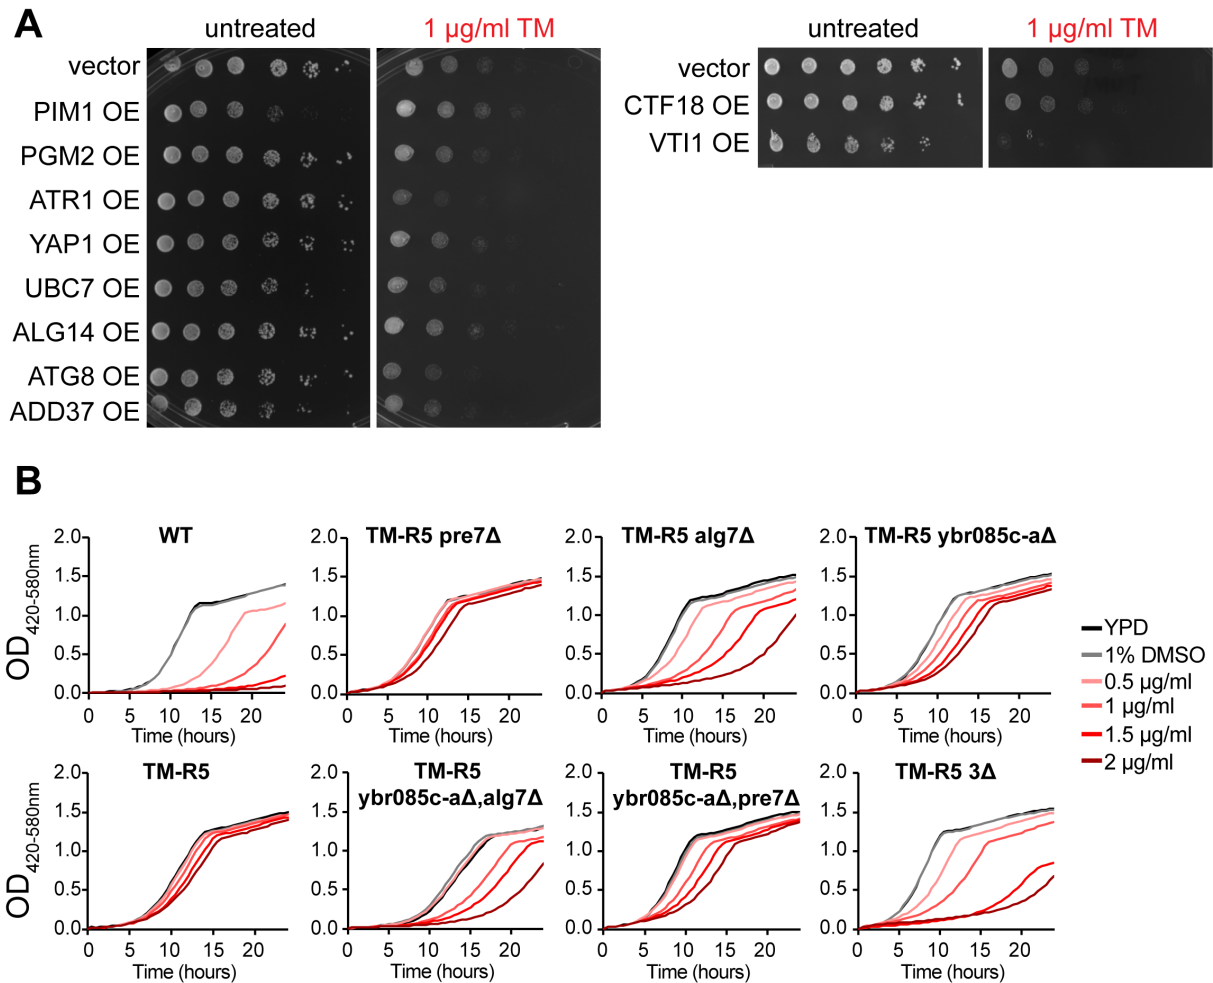

**Fig. S6.** Overexpression of *YBR085C-A*, *ALG7*, and *PRE7* in wild-type cells induces resistance to TM. (A) Resistance of strains to ER stress was determined using spot assays on SD agar plates lacking leucine in the presence of 1  $\mu\text{g/ml}$  TM. (B) Simultaneous deletion of extra copies of *PRE7*, *ALG7*, and *YBR085C-A* ( $3\Delta$ ) prevents tunicamycin resistance in TM-R5 cells. Representative growth curves of the TM-R5 derived deletion mutants grown in YPD media in the presence of indicated concentration of tunicamycin or 1% DMSO as a control.

**A**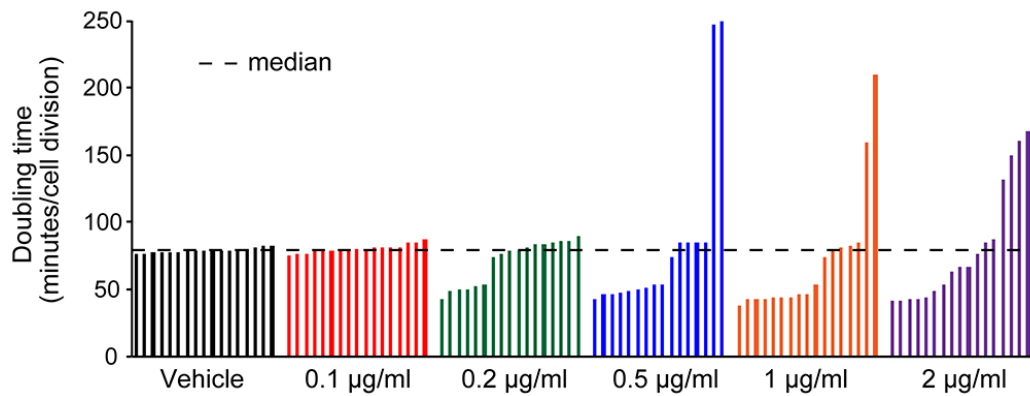**B**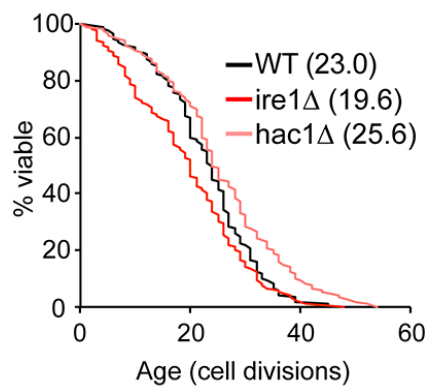**C**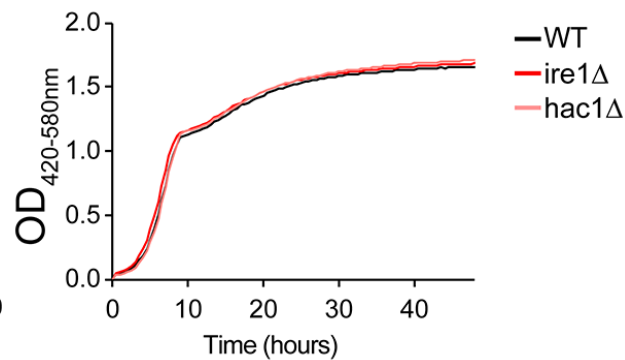

**Fig. S7.** (A) Chromosome duplications are not gained in response to low dose ER stress. Wild-type BY4741 cells were plated on YPD plates containing indicated concentrations of TM and grown at 30°C for 2-4 days. For each condition, 17 single colonies were then transferred into fresh media, and their growth rates were analyzed using standard YPD media in the absence of TM. Doubling time was calculated using the Yeast Outgrowth Data Analyzer (YODA) software. (B) Deletion of *IRE1* and *HAC1* genes does not significantly affect replicative lifespan. Mean lifespans are shown in parentheses. (C) Representative growth curves of the *ire1Δ* and *hac1Δ* mutants in YPD media.

**Table S1.** Yeast strains used in this study.

| <b>Designation</b> | <b>Strain</b>                | <b>Genotype</b>                                                                                                                       |
|--------------------|------------------------------|---------------------------------------------------------------------------------------------------------------------------------------|
| LD001              | BY4741                       | <i>MATa his3Δ1 leu2Δ0 met15Δ0 ura3Δ0</i>                                                                                              |
| LD008              | TM-R1                        | <i>MATa his3Δ1 leu2Δ0 met15Δ0 ura3Δ0</i>                                                                                              |
| LD009              | TM-R2                        | <i>MATa his3Δ1 leu2Δ0 met15Δ0 ura3Δ0</i>                                                                                              |
| LD010              | TM-R3                        | <i>MATa his3Δ1 leu2Δ0 met15Δ0 ura3Δ0</i>                                                                                              |
| LD011              | TM-R4                        | <i>MATa his3Δ1 leu2Δ0 met15Δ0 ura3Δ0</i>                                                                                              |
| LD012              | TM-R5                        | <i>MATa his3Δ1 leu2Δ0 met15Δ0 ura3Δ0</i>                                                                                              |
| LD013              | <i>ire1Δ</i>                 | <i>MATa his3Δ1 leu2Δ0 met15Δ0 ura3Δ0 ire1Δ::KanMX6</i>                                                                                |
| LD014              | <i>hac1Δ</i>                 | <i>MATa his3Δ1 leu2Δ0 met15Δ0 ura3Δ0 hac1Δ::KanMX6</i>                                                                                |
| YCM256             | W303                         | <i>MATa, ade2-1, leu2-3, ura3, trp1-1, his3-11,15, can1-100, GAL, psi+, ade1::HIS3, lys2::KanMX6</i>                                  |
| YCM257             | W303, chr1 disome            | <i>MATa, ade2-1, leu2-3, ura3, trp1-1, his3-11,15, can1-100, GAL, psi+, ade1::HIS3, ade1::KanMX6</i>                                  |
| YCM258             | W303, chr2 disome            | <i>MATa, ade2-1, leu2-3, ura3, trp1-1, his3-11,15, can1-100, GAL, psi+, lys2::HIS3, lys2::KanMX6</i>                                  |
| YCM259             | W303, chr4 disome            | <i>MATa, ade2-1, leu2-3, ura3, trp1-1, his3-11,15, can1-100, GAL, psi+, trp1::HIS3, trp1::KanMX6</i>                                  |
| YCM260             | W303, chr5 disome            | <i>MATa, ade2-1, leu2-3, ura3, trp1-1, his3-11,15, can1-100, GAL, psi+, can1::HIS3, intergenic region betwn 187520-187620::KanMX6</i> |
| YCM261             | W303, chr8 disome            | <i>MATa, ade2-1, leu2-3, ura3, trp1-1, his3-11,15, can1-100, GAL, psi+, YHR006W to 007C::HIS3, YHR006W to 007C::KanMX6</i>            |
| YCM262             | W303, chr9 disome            | <i>MATa, ade2-1, leu2-3, ura3, trp1-1, his3-11,15, can1-100, GAL, psi+, YIL009W to 008W::HIS3, YIL009W to 008W::KanMX6</i>            |
| YCM263             | W303, chr10 disome           | <i>MATa, ade2-1, leu2-3, ura3, trp1-1, his3-11,15, can1-100, GAL, psi+, ura2::HIS3, ura2::KanMX6</i>                                  |
| YCM264             | W303, chr11 disome           | <i>MATa, ade2-1, leu2-3, ura3, trp1-1, his3-11,15, can1-100, GAL, psi+, YKL006C-S to 006W::HIS3, YKL006C-S to 006W::KanMX6</i>        |
| YCM265             | W303, chr12 disome           | <i>MATa, ade2-1, leu2-3, ura3, trp1-1, his3-11,15, can1-100, GAL, psi+, ade16::HIS3, ade16::KanMX6</i>                                |
| YCM266             | W303, chr13 disome           | <i>MATa, ade2-1, leu2-3, ura3, trp1-1, his3-11,15, can1-100, GAL, psi+, ura5::HIS3, ura5::KanMX6</i>                                  |
| YCM267             | W303, chr14 disome           | <i>MATa, ade2-1, leu2-3, ura3, trp1-1, his3-11,15, can1-100, GAL, psi+, YNL005C to 004W::HIS3, YNL005C to 004W::KanMX6</i>            |
| YCM268             | W303, chr15 disome           | <i>MATa, ade2-1, leu2-3, ura3, trp1-1, his3-11,15, can1-100, GAL, psi+, leu9::HIS3, leu9::KanMX6</i>                                  |
| YCM269             | W303, chr16 disome           | <i>MATa, ade2-1, leu2-3, ura3, trp1-1, his3-11,15, can1-100, GAL, psi+, met12::HIS3, met12::KanMX6</i>                                |
| CB027              | TM-R5 Chr XIII marker strain | <i>MATa his3Δ1 leu2Δ0 met15Δ0 ura3Δ0 ymr132cΔ::KanMX6</i>                                                                             |
| CB028              | TM-R5 Chr II marker strain   | <i>MATa his3Δ1 leu2Δ0 met15Δ0 ura3Δ0 ybr242wΔ::KanMX6</i>                                                                             |



|       |                                |                                                                                     |
|-------|--------------------------------|-------------------------------------------------------------------------------------|
| CB029 | TM-R5 <i>pre7Δ</i>             | <i>MATa his3Δ1 leu2Δ0 met15Δ0 ura3Δ0 pre7Δ::KanMX6</i>                              |
| CB059 | TM-R5 <i>alg7Δ</i>             | <i>MATa his3Δ1 leu2Δ0 met15Δ0 ura3Δ0 alg7Δ::KanMX6</i>                              |
| CB060 | TM-R5 <i>ybr085c-aΔ</i>        | <i>MATa his3Δ1 leu2Δ0 met15Δ0 ura3Δ0 ybr085c-aΔ::KanMX6</i>                         |
| CB064 | TM-R5 <i>ybr085c-aΔ, alg7Δ</i> | <i>MATa his3Δ1 leu2Δ0 met15Δ0 ura3Δ0 ybr085c-aΔ::KanMX6 alg7Δ::URA3</i>             |
| CB065 | TM-R5 <i>ybr085c-aΔ, pre7Δ</i> | <i>MATa his3Δ1 leu2Δ0 met15Δ0 ura3Δ0 ybr085c-aΔ::KanMX6 pre7Δ::LEU2</i>             |
| CB066 | TM-R5 <i>3Δ</i>                | <i>MATa his3Δ1 leu2Δ0 met15Δ0 ura3Δ0 ybr085c-aΔ::KanMX6 pre7Δ::LEU2 alg7Δ::URA3</i> |

**Table S2.** Oligonucleotides used in this study.

| Name        | Sequence                          |
|-------------|-----------------------------------|
| TSL1 F      | GTGTCGACATGGCTCTCATCGTGGCATC      |
| TSL1 R      | GTGCGGCCGCATTGGTCGTTAGAGAGAAG     |
| YBR085C-A F | GTGTCGACATGTCATCTGCTCTATAC        |
| YBR085C-A R | GTGCGGCCGCCACTCGTTCAAGCCTGGC      |
| PGM2 F      | GTGTCGACATGTCATTTCAAATTGAAAC      |
| PGM2 R      | GTGCGGCCGCTTAAGTACGAACCGTTG       |
| TMA10 F     | GTGTCGACATGACCAGAACTAGCAAATG      |
| TMA10 R     | GTGCGGCCGCTTAGATGTGGTATTGTTGC     |
| PRX1 F      | GTCCTAGGATGTTTAGTAGAATTTGTAGCG    |
| PRX1 R      | GTGGCCGGCCTTATTTGACTTGGTGAATC     |
| HSP26 F     | GTCCTAGGATGTCATTTAACAGTCC         |
| HSP26 R     | GTGGCCGGCCGTCACTTTAGTTACC         |
| PLB1 F      | GTCCTAGGATGAAGTTGCAGAGTTTG        |
| PLB1 R      | GTGGCCGGCCCTAAATTAGACCGAAGAC      |
| ACH1 F      | GTCCTAGGATGACAATTTCTAATTTGTTAAAGC |
| ACH1 R      | GTGGCCGGCCCTAGTCAACTGGTTCC        |
| TPS1 F      | GTCCTAGGATGACTACGGATAACGCTAAG     |
| TPS1 R      | GTGGCCGGCCTCAGTTTTTGGTGGCAGAG     |
| ATR1 F      | GTGTCGACATGGGCAATCAGTCATTAG       |
| ATR1 R      | GTGCGGCCGCCTAAGCCACAGTGCAATC      |
| CSG2 F      | GTGTCGACATGTCTACCACACTACTTTG      |
| CSG2 R      | GTGCGGCCGCCTAATGGTGGTATTTACC      |
| PIM1 F      | GTCCTAGGATGCTAAGAACAAGAACCAC      |
| PIM1 R      | GTGGCCGGCCTTAGTCCTTTTCCTTTTATG    |
| ADD37 F     | GTCCTAGGATGGCTATTAACCAACCAAAAAG   |
| ADD37 R     | GTGGCCGGCCTTAATTAGGCATCGCA        |
| YAP1 F      | GTCCTAGGATGAGTGTGTCTACCGCCAAG     |
| YAP1 R      | GTGGCCGGCCTTAGTTCATATGCTTATTC     |
| VTI1 F      | GTGTCGACATGAGTTCCTATTAATATC       |
| VTI1 R      | GTGCGGCCGCTTATTTAAACTTTGAGAAC     |
| CTF18 F     | GTCCTAGGATGGTTGATACCGCACCATAC     |
| CTF18 R     | GAGGCCGGCCTTATTCCACAGGTTATTCC     |

|               |                                                                  |
|---------------|------------------------------------------------------------------|
| RER2 F        | GTCCTAGGATGGAAACGGATAGTGGTATAC                                   |
| RER2 R        | GTGGCCGGCCAGACCTTTCTTAATTCAAC                                    |
| ALG7 F        | GTCCTAGGATGTTGCGACTTTTTTCACTGGC                                  |
| ALG7 R        | GTGGCCGGCCTCAACGTACTGTCCATAG                                     |
| NTH1 F        | GTGTCGACATGAGTCAAGTTAATAACAAG                                    |
| NTH1 R        | GTGCGGCCGCTCTCAACTATAGTCCATAG                                    |
| UBC7 F        | GTGTCGACATGTTCGAAAACCGCTCAGAAAC                                  |
| UBC7 R        | GTGCGGCCGCTCAGAATCCTAATGATTTC                                    |
| ATG8 F        | GTGTCGACATGAAGTCTACATTTAAGTCTG                                   |
| ATG8 R        | GTGCGGCCGCTACCTGCCAAATGTATTTTC                                   |
| PRE8 F        | GTCCTAGGATGACCGACAGATATTC                                        |
| PRE8 R        | GTGGCCGGCCTCATAATGCTTCTAATC                                      |
| TFC1 F        | GTGTCGACATGCCAGTGGAGGAGCCTC                                      |
| TFC1 R        | GTGCGGCCGCTTACAGATCGACTTCATC                                     |
| PRE7 F        | GTGTCGACATGGCCACTATTGCATCAG                                      |
| PRE7 R        | GTGCGGCCGCTTAATCTCTTTTTAGCTC                                     |
| ALG14 F       | GTGTCGACATGAAAACGGCCTACTTGG                                      |
| ALG14 R       | GTGCGGCCGCTTAAACAAGGATGCC                                        |
| PRE5 F        | GTGTCGACATGTTTCAGGAACAATTAC                                      |
| PRE5 R        | GTGCGGCCGCTAGATGTATTTAGCAAC                                      |
| UMP1 F        | GTGTCGACATGAATATCGTCCCACAAG                                      |
| UMP1 R        | GTGCGGCCGCTTAAATGCCTAATTG                                        |
| SEC18 F       | GTCCTAGGATGTTCAAGATACCTGG                                        |
| SEC18 R       | GTGGCCGGCCTTATGCGGATTGGGTCATC                                    |
| YMR132C mut F | GAATTATAAGGCTCAATTGAAATTCAACTTTTCAATAACACTGT<br>TTAGCTTGCCTCGTC  |
| YMR132C mut R | TGGTACTCTATTTTGAAGCGTCTACGTTATGTAGATGATACGTT<br>AGTATCGAATCGACAG |
| YBR242W mut F | ATAAAAAACAATTGTCAAAGAAAGCCTACATAAAAAAATCTG<br>TTAGCTTGCCTCGTC    |
| YBR242W mut R | CTTTGTACTTTTATGACGCAAAAGTTGGTATTTATGATAACGTT<br>AGTATCGAATCGACAG |
| PRE7 mut F    | AGAGTAGCCAAGACTATTGAACTATAAAGTTAAACAAAATCTG<br>TTAGCTTGCCTCGTC   |
| PRE7 mut R    | GATATTGGTCTATTTCTTTTTATACTATGATATGTATGCACGTTA<br>GTATCGAATCGACAG |

|                 |                                                                             |
|-----------------|-----------------------------------------------------------------------------|
| ALG7 mut F      | AGTAGAGCAAGGCGGAGAACGGTAACAAAAAGTAGACTATCT<br>GTTTAGCTTGCCTCGTC             |
| ALGL7 mut R     | TGCGTCATAAAAGTACAAAGTAACTACCAATACATAATCTCGT<br>TAGTATCGAATCGACAG            |
| YBR085C-A mut F | CTCAAGTTACCAACTACAATAAATTACATTATACTATAACCTGT<br>TTAGCTTGCCTCGTC             |
| YBR085C-A mut R | CATGAAGTGACTCGTATCGAACAAATATTTAGCCACTCGTCGTT<br>AGTATCGAATCGACAG            |
| ALG7 mut F2     | GTAGAGCAAGGCGGAGAACGGTAACAAAAAGTAGACTATGAT<br>TGTACTGAGAGTGCACCACGCTTTTCAA  |
| ALG7 mut R2     | GCGTCATAAAAGTACAAAGTAACTACCAATACATAATCTTTAG<br>TTTTGCTGGCCGCATCTTCTCAAATATG |
| PRE7 mut F2     | GAGTAGCCAAGACTATTGAACTATAAAGTTAAACAAAATCTCG<br>AGGAGAACTTCTAGTATATCTACATAC  |
| PRE7 mut R2     | GATATTGGTCTATTTCTTTTTATACTATGATATGTATGCATTAAG<br>CAAGGATTTTCTTAACTTCTTCGGC  |
| HAC1 RT-PCR F   | CCGTAGACAACAACAATTTG                                                        |
| HAC1 RT-PCR R   | CATGAAGTGATGAAGAAATC                                                        |
